# Supplementary material for: NALCN channelopathies: Distinguishing gain-of-function and loss-of-function mutations
Source: PubMed Central journal article supplement — Neurology. 2016 Sep 13;87(11):1131–9. doi: 10.1212/WNL.0000000000003095 (PMC5027803; doi:10.1212/wnl.0000000000003095), 2016-09-13
Supplement: supp_WNL.0000000000003095_NALCN_Figure_e-1.pdf [file supp_WNL.0000000000003095_NALCN_Figure_e-1.pdf]

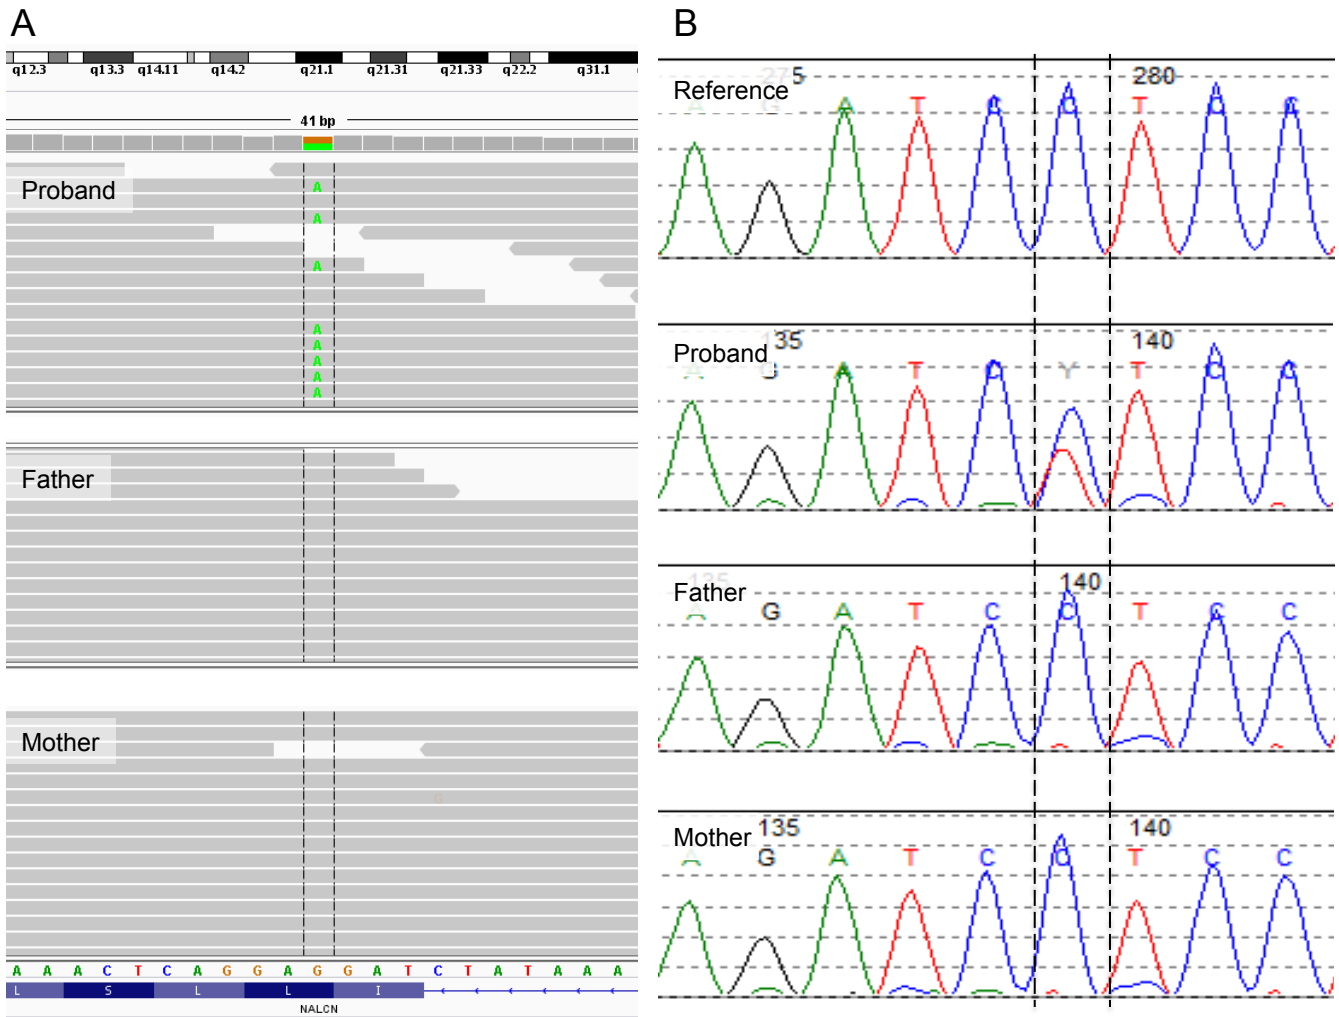

Figure e-1. Identification and confirmation of the *NALCN* variant. (A) Integrative Genomics Viewer (IGV) showing the chromosome region and *NALCN* exome sequencing results in the proband and the two unaffected parents. (B) Sanger sequencing shows the confirmation of the de novo change in *NALCN* (c.1768C>T; p.Leu590Phe).
