# Supplementary material for: NALCN channelopathies: Distinguishing gain-of-function and loss-of-function mutations
Source: PubMed Central journal article supplement — Neurology. 2016 Sep 13;87(11):1131–9. doi: 10.1212/WNL.0000000000003095 (PMC5027803; doi:10.1212/wnl.0000000000003095), 2016-09-13
Supplement: supp_WNL.0000000000003095_NALCN_Figure_e-2.pdf [file supp_WNL.0000000000003095_NALCN_Figure_e-2.pdf]

**A** aldicarb-sensitivity of CLIFAHDD 'fainter' variants

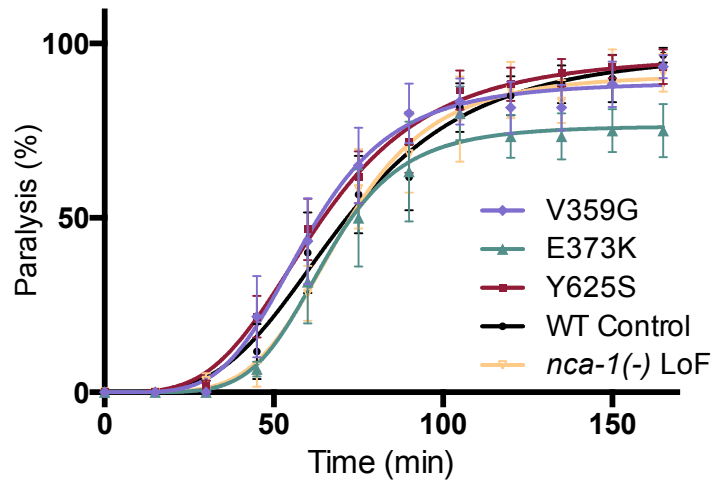

**B** aldicarb: half paralysis

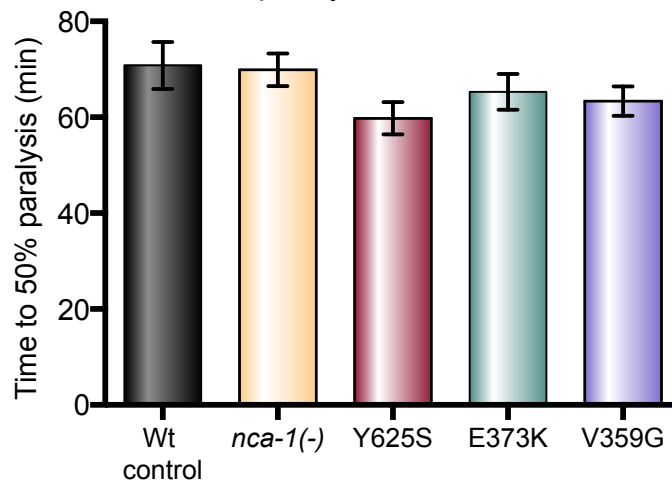

**C** aldicarb: slope

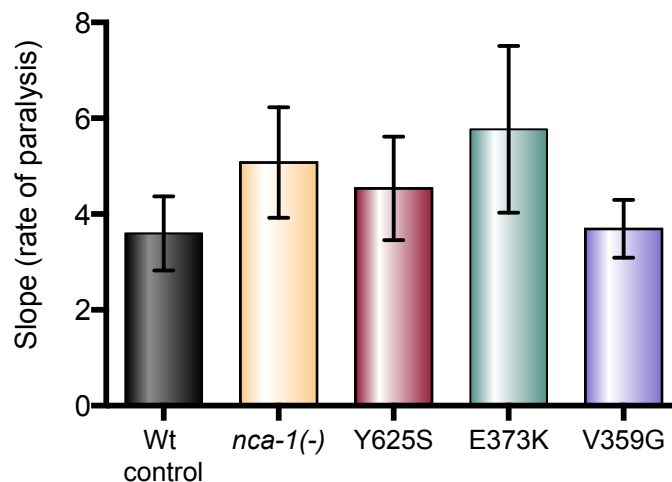

**Figure e-2. Loss-of-function CLIFAHDD variants are not hypersensitive to aldicarb.**

(A) Aldicarb-sensitivity of CLIFAHDD 'fainter' variants. The mutations displayed here were assayed with all others, but paralyzed at the same rate as the wild-type control. (B) Aldicarb – time to half paralysis. All mutants reached 'half-paralysis' at approximately 70 min—the same time as the wild type and loss-of-function control *nca-1(gk9)*. (C) Aldicarb – slope. The rate of paralysis was the same between mutants and the controls.
